# Supplementary material for: Na-Ion storage in iron hydroxide phosphate hydrate through a reversible crystalline-to-amorphous phase transition
Source: Royal Society of Chemistry journal article supplement (doi:10.1039/d0nr01922d), 2020-01-01
Supplement: d0nr01922d1.pdf [file d0nr01922d1.pdf]

## Supporting information

### **Na-ion storage in iron hydroxide phosphate hydrate through a reversible crystalline-to-amorphous phase transition**

Christian Henriksen,<sup>[a]</sup> Martin Aaskov Karlsen,<sup>[a]</sup> Christian Lund Jakobsen<sup>[a]</sup> and Dorthe Bomholdt Ravnsbæk<sup>\*[a]</sup>

[a] Department of Physics, Chemistry and Pharmacy, University of Southern Denmark, 5230 Odense, Denmark

\*E-mail: [dbra@sdu.dk](mailto:dbra@sdu.dk)

**Table S1.** Results of the Rietveld refinement of the as-synthesized  $\text{Fe}_{1.13}(\text{PO}_4)(\text{OH})_{0.39}(\text{H}_2\text{O})_{0.61}$  (Figure 1).

| Unit cell parameters [Å] |          | <i>a</i>                          | 5.1702(3)                     | <i>c</i>                       | 13.0600(14)                 |
|--------------------------|----------|-----------------------------------|-------------------------------|--------------------------------|-----------------------------|
| Atom                     | <i>x</i> | <i>y</i>                          | <i>z</i>                      | <i>B</i> <sub>iso</sub>        | Occupancy                   |
| Fe1                      | 0        | 1/2                               | 0                             | 0.93                           | 0.56(2)                     |
| P1                       | 1/2      | 1/4                               | 1/8                           | 0.70                           | 1.00                        |
| O1                       | 0        | 3/4                               | 1/8                           | = <i>B</i> <sub>iso</sub> (P)  | 1.00                        |
| O2                       | 0.25574  | 1/4                               | 0.06010                       | = <i>B</i> <sub>iso</sub> (P)  | 1.00                        |
| H1                       | 0        | 3/4                               | 1/8                           | = <i>B</i> <sub>iso</sub> (P)  | 1.00                        |
| Agreement factors        |          | <i>R</i> <sub>Bragg</sub> = 6.61% | <i>R</i> <sub>p</sub> = 12.1% | <i>R</i> <sub>wp</sub> = 23.7% | $\chi^2 = 0.817 \cdot 10^6$ |

**Table S2.** Results of refinement for the PDF of the as-synthesized FPOH material.

| Parameter                                      | Crystalline FPOH |
|------------------------------------------------|------------------|
| Scale Factor                                   | 0.282 ± 0.017    |
| <i>a</i> [Å]                                   | 5.1797 ± 0.0027  |
| <i>c</i> [Å]                                   | 13.079 ± 0.012   |
| $\delta_2$ [Å <sup>2</sup> ]                   | 2.21 ± 0.14      |
| <i>spd</i> [Å]                                 | 144 ± 30         |
| <i>u</i> <sub>11,Fe</sub> [Å <sup>2</sup> ]    | 0.0052 ± 0.0042  |
| <i>u</i> <sub>22,Fe</sub> [Å <sup>2</sup> ]    | 0.0384 ± 0.0093  |
| <i>u</i> <sub>33,Fe</sub> [Å <sup>2</sup> ]    | 0.0085 ± 0.0037  |
| <i>u</i> <sub>13/23,Fe</sub> [Å <sup>2</sup> ] | 0.0092 ± 0.0056  |
| <i>u</i> <sub>11,22P</sub> [Å <sup>2</sup> ]   | 0.0096 ± 0.0037  |
| <i>u</i> <sub>33,P</sub> [Å <sup>2</sup> ]     | 0.0094 ± 0.0057  |
| <i>u</i> <sub>11/22,O1</sub> [Å <sup>2</sup> ] | 0.065 ± 0.027    |
| <i>u</i> <sub>33,O1</sub> [Å <sup>2</sup> ]    | 0.031 ± 0.032    |
| <i>u</i> <sub>11,O2</sub> [Å <sup>2</sup> ]    | 0.053 ± 0.021    |
| <i>u</i> <sub>22,O2</sub> [Å <sup>2</sup> ]    | 0.024 ± 0.012    |
| <i>u</i> <sub>33,O2</sub> [Å <sup>2</sup> ]    | 0.061 ± 0.021    |
| <i>u</i> <sub>13/23,O2</sub> [Å <sup>2</sup> ] | -0.031 ± 0.018   |
| <i>x</i> <sub>O2</sub> [ <i>a</i> ]            | 0.2488 ± 0.0042  |
| <i>z</i> <sub>O2</sub> [ <i>c</i> ]            | 0.0606 ± 0.0021  |
| <i>r</i> <sub>w</sub>                          | 0.21             |

**Table S3.** Results of refinement of the PDF for the discharged material, Na<sub>0.83</sub>FPOH.

| Parameter                                    | Ordered Na <sub>x</sub> FPOH | Amorphous Na <sub>x</sub> FPOH | Graphite        |
|----------------------------------------------|------------------------------|--------------------------------|-----------------|
| Scale Factor                                 | 0.090 ± 0.023                | 0.49 ± 0.25                    | 0.030 ± 0.023   |
| <i>a</i> [Å]                                 | 5.268 ± 0.021                | 5.6 ± 0.1                      | 2.470 ± 0.017   |
| <i>c</i> [Å]                                 | 13.1 ± 0.1                   | 10.82 ± 0.41                   | -               |
| δ <sub>2</sub> [Å <sup>2</sup> ]             | 3.43 ± 0.95                  | 1.94 ± 0.37                    | 2.9 ± 8.1       |
| <i>spd</i> [Å]                               | 53 ± 18                      | 5.8 ± 1.1                      | 16 ± 12         |
| <i>u</i> <sub>iso,Fe</sub> [Å <sup>2</sup> ] | 0.0149 ± 0.0089              |                                | -               |
| <i>u</i> <sub>iso,P</sub> [Å <sup>2</sup> ]  | 0.0235 ± 0.021               |                                | -               |
| <i>u</i> <sub>iso,O1</sub> [Å <sup>2</sup> ] | 1.3 ± 1.1                    |                                | -               |
| <i>u</i> <sub>iso,O2</sub> [Å <sup>2</sup> ] | 0.029 ± 0.022                |                                | -               |
| <i>u</i> <sub>iso,C</sub> [Å <sup>2</sup> ]  | -                            |                                | 0.0021 ± 0.0031 |
| <i>r</i> <sub>w</sub>                        | 0.33                         |                                |                 |

**Table S4.** Results of refinement of the PDF for the recharged material, Na<sub>0.02</sub>FPOH. The asterisk of the coherent domain size of the graphite phase indicates that it was fixed.

| Parameter                                    | Ordered FPOH    | Disordered FPOH | Graphite        |
|----------------------------------------------|-----------------|-----------------|-----------------|
| Scale Factor                                 | 0.171 ± 0.019   | 0.26 ± 0.15     | 0.030 ± 0.015   |
| <i>a</i> [Å]                                 | 5.2060 ± 0.0045 | 5.4 ± 0.2       | 2.472 ± 0.014   |
| <i>c</i> [Å]                                 | 13.055 ± 0.025  | 10.89 ± 0.71    | -               |
| δ <sub>2</sub> [Å <sup>2</sup> ]             | 2.1 ± 0.3       | 1.85 ± 0.64     | 3.9 ± 5.3       |
| <i>spd</i> [Å]                               | 120 ± 36        | 6.8 ± 2.2       | 18*             |
| <i>u</i> <sub>iso,Fe</sub> [Å <sup>2</sup> ] | 0.0119 ± 0.0031 |                 | -               |
| <i>u</i> <sub>iso,P</sub> [Å <sup>2</sup> ]  | 0.0143 ± 0.0057 |                 | -               |
| <i>u</i> <sub>iso,O1</sub> [Å <sup>2</sup> ] | 0.039 ± 0.016   |                 | -               |
| <i>u</i> <sub>iso,O2</sub> [Å <sup>2</sup> ] | 0.042 ± 0.012   |                 | -               |
| <i>u</i> <sub>iso,C</sub> [Å <sup>2</sup> ]  | -               |                 | 0.0021 ± 0.0024 |
| <i>r</i> <sub>w</sub>                        | 0.26            |                 |                 |

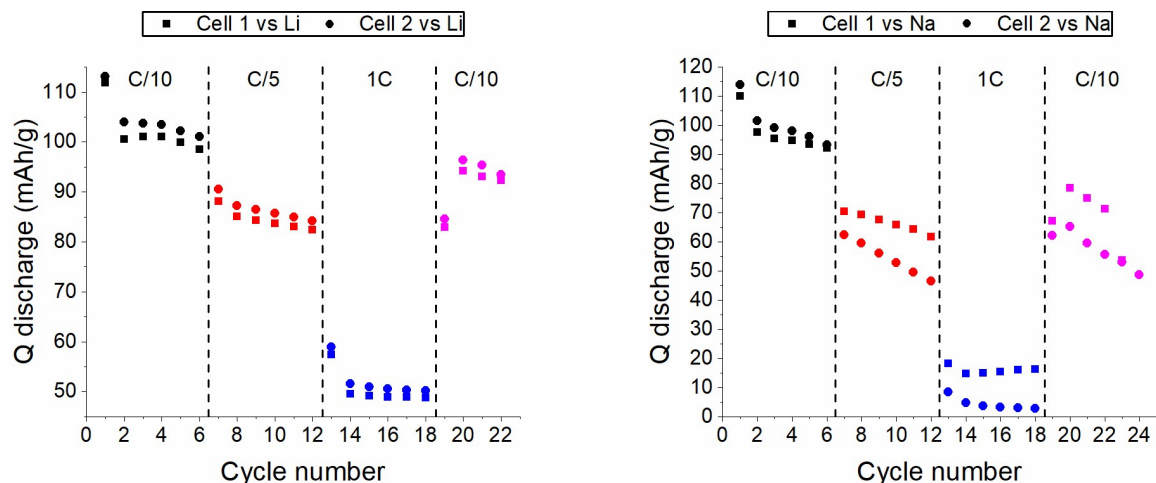

**Figure S1.** Rate capability tests of FPOH against (left) Li anode and (right) Na anode. Two cells were measured against each anode and the consecutive current rates were performed on the same cell, but with relaxation between current rates.

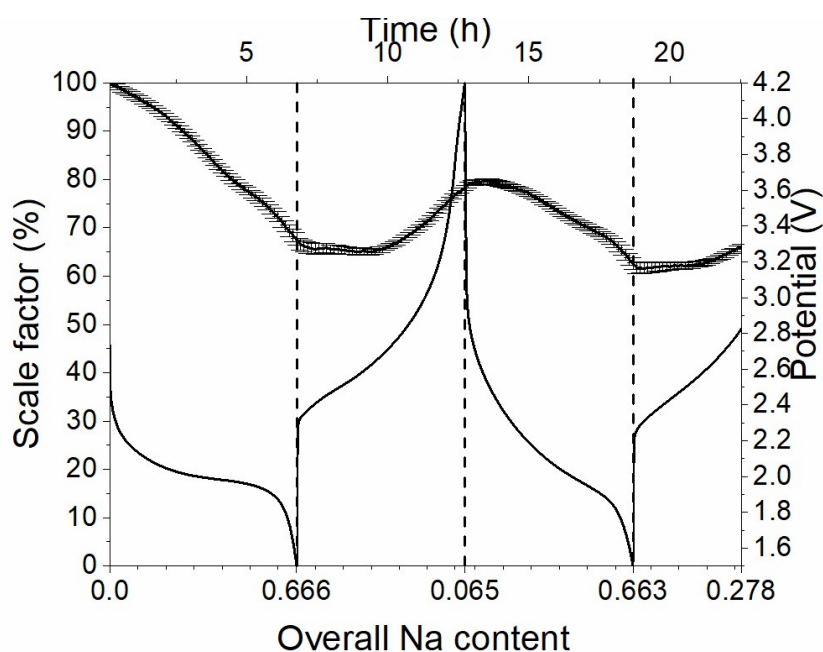

**Figure S2.** Scale factor (extracted from Rietveld refinement of the *operando* PXRD data) for the crystalline Na<sub>x</sub>FPOH phase as a function of Na-content in the electrode.
